# Supplementary material
Source: ML conference proceedings conference paper supplement (https://openaccess.thecvf.com/content/CVPR2023/html/Weber_Power_Bundle_Adjustment_CVPR_2023_paper.html)
Supplement: Supplementary file 1 [file Weber_Power_Bundle_Adjustment_CVPR_2023_supplemental.pdf]

# Power Bundle Adjustment for Large-Scale 3D Reconstruction Supplementary

Simon Weber<sup>1,2</sup>

sim.weber@tum.de

Nikolaus Demmel<sup>1,2</sup>

nikolaus.demmel@tum.de

Tin Chon Chan<sup>1,2</sup>

tin-1254@hotmail.com

Daniel Cremers<sup>1,2,3</sup>

cremers@tum.de

In this supplementary material we provide additional details to augment the content of the main paper. Section 1 contains a proof of Proposition 1 in the main paper. In Section 2 we evaluate different levels of noises to highlight the consistence of our solver. In Section 3 we tabulate the percentage of solved problems of the performance profiles (Sec. 5.2.) for each tolerance  $\tau \in \{0.1, 0.01, 0.03, 0.001\}$  and for each solver. In Section 4 we list the evaluated problems from the BAL dataset.

## 1. Proof of Proposition 1

Firstly, simple product expansion gives

$$(I - M)(I + \dots + M^i) = I - M^{i+1}. \quad (\text{A})$$

Since the spectral norm is sub-multiplicative and

$$\|M\| < 1, \quad (\text{B})$$

it is straightforward that

$$\|M^i\| \leq \|M\|^i \xrightarrow{i \rightarrow \infty} 0. \quad (\text{C})$$

Thus,

$$M^i \xrightarrow{i \rightarrow \infty} \mathbf{0}. \quad (\text{D})$$

Taking the limit of both sides in (A) gives (1).

Secondly,

$$R = \sum_{i=m+1}^{\infty} M^i = M^{m+1} \sum_{i=0}^{\infty} M^i = M^{m+1}(I - M)^{-1}. \quad (\text{E})$$

It follows that

$$\|R\| = \|M^{m+1} \sum_{i=0}^{\infty} M^i\| \leq \|M\|^{m+1} \sum_{i=0}^{\infty} \|M\|^i. \quad (\text{F})$$

Since  $\|M\| < 1$  we have

$$\sum_{i=0}^{\infty} \|M\|^i = \frac{1}{1 - \|M\|}, \quad (\text{G})$$

which directly leads to the inequality

$$\|R\| \leq \frac{\|M\|^{m+1}}{1 - \|M\|}. \quad (\text{H})$$

## 2. Consistence

In Sec. 5.2. initial landmark and camera positions are perturbed with a small Gaussian noise  $(m, \sigma) = (0, 0.01)$ . We observe that the relative performance of solvers is similar for different noise levels. Fig. 1 and 2 illustrate the consistence of our results with different initial noises  $\sigma = 0.05$  and  $\sigma = 0.1$ .

<sup>1</sup>Technical University of Munich

<sup>2</sup>Munich Center for Machine Learning

<sup>3</sup>University of Oxford

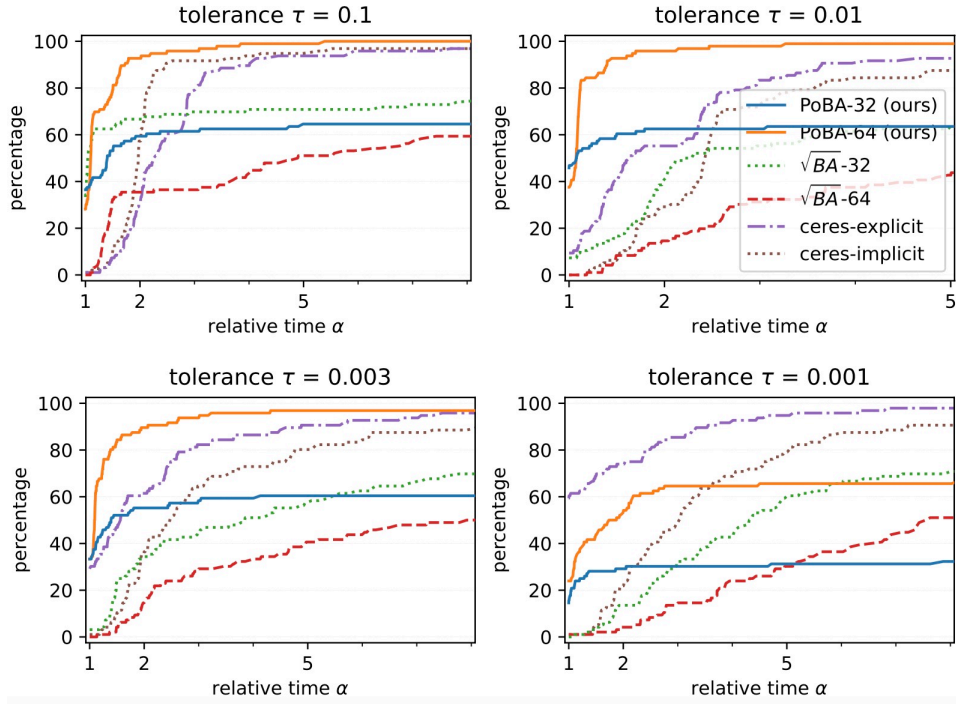

Figure 1. Performance profiles for all BAL problems show the percentage of problems solved to a given accuracy tolerance  $\tau \in \{0.1, 0.01, 0.003, 0.001\}$  with relative runtime  $\alpha$ . Initial landmark and camera positions are disturbed with a Gaussian noise  $(0, 0.05)$ .

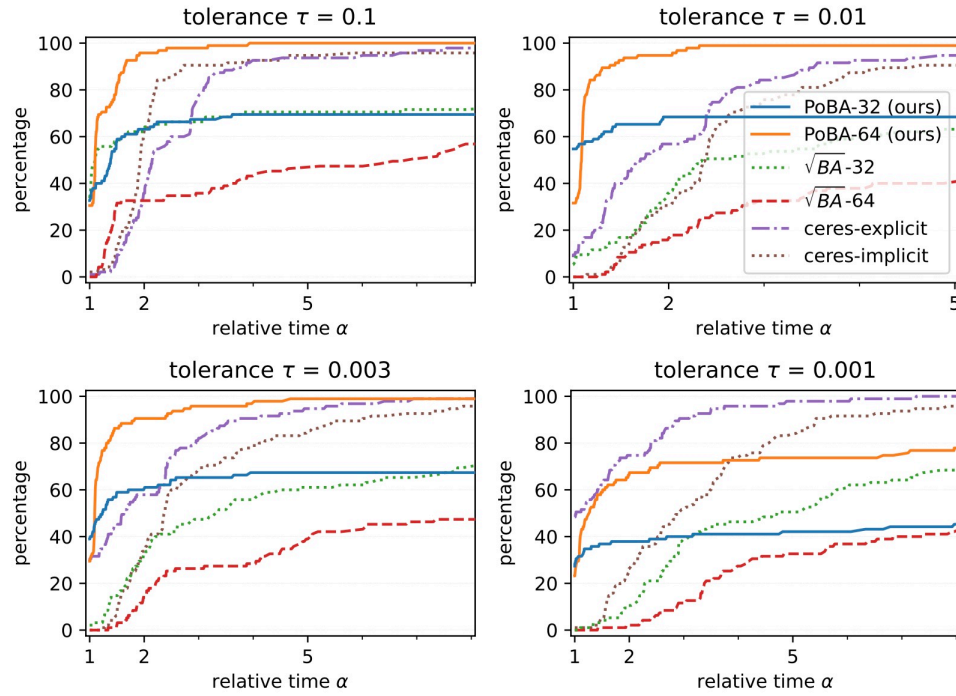

Figure 2. Performance profiles for all BAL problems show the percentage of problems solved to a given accuracy tolerance  $\tau \in \{0.1, 0.01, 0.003, 0.001\}$  with relative runtime  $\alpha$ . Initial landmark and camera positions are disturbed with a Gaussian noise  $(0, 0.1)$ .

### 3. Tables of solved problems associated to the performance profiles

| Solver          | $\alpha = 1$ | $\alpha = 3$ | $\alpha = \infty$ |
|-----------------|--------------|--------------|-------------------|
| PoBA-64 (ours)  | 7%           | 100%         | 100%              |
| PoBA-32 (ours)  | 62%          | 88%          | 88%               |
| $\sqrt{BA}$ -64 | 0%           | 60%          | 81%               |
| $\sqrt{BA}$ -32 | 31%          | 90%          | 98%               |
| ceres-explicit  | 0%           | 49%          | 95%               |
| ceres-implicit  | 0%           | 81%          | 95%               |

  

| Solver          | $\alpha = 1$ | $\alpha = 3$ | $\alpha = \infty$ |
|-----------------|--------------|--------------|-------------------|
| PoBA-64 (ours)  | 20%          | 90%          | 93%               |
| PoBA-32 (ours)  | 44%          | 75%          | 79%               |
| $\sqrt{BA}$ -64 | 0%           | 58%          | 84%               |
| $\sqrt{BA}$ -32 | 22%          | 90%          | 98%               |
| ceres-explicit  | 14%          | 71%          | 90%               |
| ceres-implicit  | 0%           | 66%          | 91%               |

  

| Solver          | $\alpha = 1$ | $\alpha = 3$ | $\alpha = \infty$ |
|-----------------|--------------|--------------|-------------------|
| PoBA-64 (ours)  | 18%          | 98%          | 98%               |
| PoBA-32 (ours)  | 60%          | 84%          | 84%               |
| $\sqrt{BA}$ -64 | 0%           | 62%          | 79%               |
| $\sqrt{BA}$ -32 | 22%          | 83%          | 97%               |
| ceres-explicit  | 2%           | 66%          | 90%               |
| ceres-implicit  | 0%           | 80%          | 90%               |

  

| Solver          | $\alpha = 1$ | $\alpha = 3$ | $\alpha = \infty$ |
|-----------------|--------------|--------------|-------------------|
| PoBA-64 (ours)  | 13%          | 52%          | 58%               |
| PoBA-32 (ours)  | 8%           | 26%          | 27%               |
| $\sqrt{BA}$ -64 | 0%           | 63%          | 85%               |
| $\sqrt{BA}$ -32 | 21%          | 88%          | 98%               |
| ceres-explicit  | 54%          | 83%          | 90%               |
| ceres-implicit  | 4%           | 75%          | 90%               |

Table 1. Percentage of solved problems of the performance profiles (Sec. 5.2.) for each solver and for tolerance  $\tau = 0.1$  (upper left),  $\tau = 0.01$  (upper right),  $\tau = 0.003$  (lower left) and  $\tau = 0.001$  (lower right). We conclude that PoBA is particularly well suited for very fast/low-accurate ( $\tau = 0.1$ ), fast/medium-accurate ( $\tau = 0.01$ ) and slow/high-accurate ( $\tau = 0.003$ ) applications.

### 4. Problems Table

|              | cameras | landmarks | observations |
|--------------|---------|-----------|--------------|
| ladybug-49   | 49      | 7,766     | 31,812       |
| ladybug-73   | 73      | 11,022    | 46,091       |
| ladybug-138  | 138     | 19,867    | 85,184       |
| ladybug-318  | 318     | 41,616    | 179,883      |
| ladybug-372  | 372     | 47,410    | 204,434      |
| ladybug-412  | 412     | 52,202    | 224,205      |
| ladybug-460  | 460     | 56,799    | 241,842      |
| ladybug-539  | 539     | 65,208    | 277,238      |
| ladybug-598  | 598     | 69,193    | 304,108      |
| ladybug-646  | 646     | 73,541    | 327,199      |
| ladybug-707  | 707     | 78,410    | 349,753      |
| ladybug-783  | 783     | 84,384    | 376,835      |
| ladybug-810  | 810     | 88,754    | 393,557      |
| ladybug-856  | 856     | 93,284    | 415,551      |
| ladybug-885  | 885     | 97,410    | 434,681      |
| ladybug-931  | 931     | 102,633   | 457,231      |
| ladybug-969  | 969     | 105,759   | 474,396      |
| ladybug-1064 | 1,064   | 113,589   | 509,982      |
| ladybug-1118 | 1,118   | 118,316   | 528,693      |
| ladybug-1152 | 1,152   | 122,200   | 545,584      |
| ladybug-1197 | 1,197   | 126,257   | 563,496      |
| ladybug-1235 | 1,235   | 129,562   | 576,045      |
| ladybug-1266 | 1,266   | 132,521   | 587,701      |
| ladybug-1340 | 1,340   | 137,003   | 612,344      |

|               |         |           |              |
|---------------|---------|-----------|--------------|
| ladybug-1469  | 1,469   | 145,116   | 641,383      |
| ladybug-1514  | 1,514   | 147,235   | 651,217      |
| ladybug-1587  | 1,587   | 150,760   | 663,019      |
| ladybug-1642  | 1,642   | 153,735   | 670,999      |
| ladybug-1695  | 1,695   | 155,621   | 676,317      |
| ladybug-1723  | 1,723   | 156,410   | 678,421      |
|               | cameras | landmarks | observations |
| trafalgar-21  | 21      | 11,315    | 36,455       |
| trafalgar-39  | 39      | 18,060    | 63,551       |
| trafalgar-50  | 50      | 20,431    | 73,967       |
| trafalgar-126 | 126     | 40,037    | 148,117      |
| trafalgar-138 | 138     | 44,033    | 165,688      |
| trafalgar-161 | 161     | 48,126    | 181,861      |
| trafalgar-170 | 170     | 49,267    | 185,604      |
| trafalgar-174 | 174     | 50,489    | 188,598      |
| trafalgar-193 | 193     | 53,101    | 196,315      |
| trafalgar-201 | 201     | 54,427    | 199,727      |
| trafalgar-206 | 206     | 54,562    | 200,504      |
| trafalgar-215 | 215     | 55,910    | 203,991      |
| trafalgar-225 | 225     | 57,665    | 208,411      |
| trafalgar-257 | 257     | 65,131    | 225,698      |
|               | cameras | landmarks | observations |
| dubrovnik-16  | 16      | 22,106    | 83,718       |
| dubrovnik-88  | 88      | 64,298    | 383,937      |
| dubrovnik-135 | 135     | 90,642    | 552,949      |
| dubrovnik-142 | 142     | 93,602    | 565,223      |
| dubrovnik-150 | 150     | 95,821    | 567,738      |
| dubrovnik-161 | 161     | 103,832   | 591,343      |
| dubrovnik-173 | 173     | 111,908   | 633,894      |
| dubrovnik-182 | 182     | 116,770   | 668,030      |
| dubrovnik-202 | 202     | 132,796   | 750,977      |
| dubrovnik-237 | 237     | 154,414   | 857,656      |
| dubrovnik-253 | 253     | 163,691   | 898,485      |
| dubrovnik-262 | 262     | 169,354   | 919,020      |
| dubrovnik-273 | 273     | 176,305   | 942,302      |
| dubrovnik-287 | 287     | 182,023   | 970,624      |
| dubrovnik-308 | 308     | 195,089   | 1,044,529    |
| dubrovnik-356 | 356     | 226,729   | 1,254,598    |
|               | cameras | landmarks | observations |
| venice-52     | 52      | 64,053    | 347,173      |
| venice-89     | 89      | 110,973   | 562,976      |
| venice-245    | 245     | 197,919   | 1,087,436    |
| venice-427    | 427     | 309,567   | 1,695,237    |
| venice-744    | 744     | 542,742   | 3,054,949    |
| venice-951    | 951     | 707,453   | 3,744,975    |
| venice-1102   | 1,102   | 779,640   | 4,048,424    |
| venice-1158   | 1,158   | 802,093   | 4,126,104    |
| venice-1184   | 1,184   | 815,761   | 4,174,654    |
| venice-1238   | 1,238   | 842,712   | 4,286,111    |
| venice-1288   | 1,288   | 865,630   | 4,378,614    |

|             |         |           |              |
|-------------|---------|-----------|--------------|
| venice-1350 | 1,350   | 893,894   | 4,512,735    |
| venice-1408 | 1,408   | 911,407   | 4,630,139    |
| venice-1425 | 1,425   | 916,072   | 4,652,920    |
| venice-1473 | 1,473   | 929,522   | 4,701,478    |
| venice-1490 | 1,490   | 934,449   | 4,717,420    |
| venice-1521 | 1,521   | 938,727   | 4,734,634    |
| venice-1544 | 1,544   | 941,585   | 4,745,797    |
| venice-1638 | 1,638   | 975,980   | 4,952,422    |
| venice-1666 | 1,666   | 983,088   | 4,982,752    |
| venice-1672 | 1,672   | 986,140   | 4,995,719    |
| venice-1681 | 1,681   | 982,593   | 4,962,448    |
| venice-1682 | 1,682   | 982,446   | 4,960,627    |
| venice-1684 | 1,684   | 982,447   | 4,961,337    |
| venice-1695 | 1,695   | 983,867   | 4,966,552    |
| venice-1696 | 1,696   | 983,994   | 4,966,505    |
| venice-1706 | 1,706   | 984,707   | 4,970,241    |
| venice-1776 | 1,776   | 993,087   | 4,997,468    |
| venice-1778 | 1,778   | 993,101   | 4,997,555    |
|             | cameras | landmarks | observations |
| final-93    | 93      | 61,203    | 287,451      |
| final-394   | 394     | 100,368   | 534,408      |
| final-871   | 871     | 527,480   | 2,785,016    |
| final-961   | 961     | 187,103   | 1,692,975    |
| final-1936  | 1,936   | 649,672   | 5,213,731    |
| final-3068  | 3,068   | 310,846   | 1,653,045    |
| final-4585  | 4,585   | 1,324,548 | 9,124,880    |
| final-13682 | 13,682  | 4,455,575 | 28,973,703   |

Table 2. List of all 97 BAL problems including number of cameras, landmarks and observations. These are the problems evaluated for performance profiles in the main paper.
